# Supplementary material
Source: Research Square preprint supplement (doi:10.21203/rs.3.rs-8889118/v1)
Supplement: Supplementary file 1 [file f01c580852c2e8efde9eb583.docx]

**Supporting Information**

**SPP1 knockdown inhibits invasion, migration and paclitaxel-induced Epithelial-Mesenchymal Transition in Cervical Cancer Cells through the TGF-β/Akt/Snail pathway**

Qianqian Cao, Yayin Lin, Huiwen Guan, Chunlin Dong, Yunjun Ge, Min Li, Qian Zhang, Shuhui Guo, Mingyu Qin, Jinjin Yu, Guosheng Wu

**Supplementary Figure 1.** SPP1 was a risk factor for cervical cancer.

**Supplementary Figure 2.** IHC was used to detect the expression level of SPP1 protein in cervical cancer tissues (T) and adjacent normal tissues (ANT).

**Supplementary Figure 3.** Validations of SPP1 knockdown in C-33A and SiHa cells using RT-qPCR.

**Supplementary Figure 4.** The mRNA level of Smad7 was detected using RT-qPCR.

**Supplementary Figure 5.** The histopathological H&E staining results of representative samples of liver, spleen, kidney and heart of mice after treatment in each group.

**Supplementary Table 1.** Our cervical cancer cohorts.

**Supplementary Table 2.** List of antibodies.


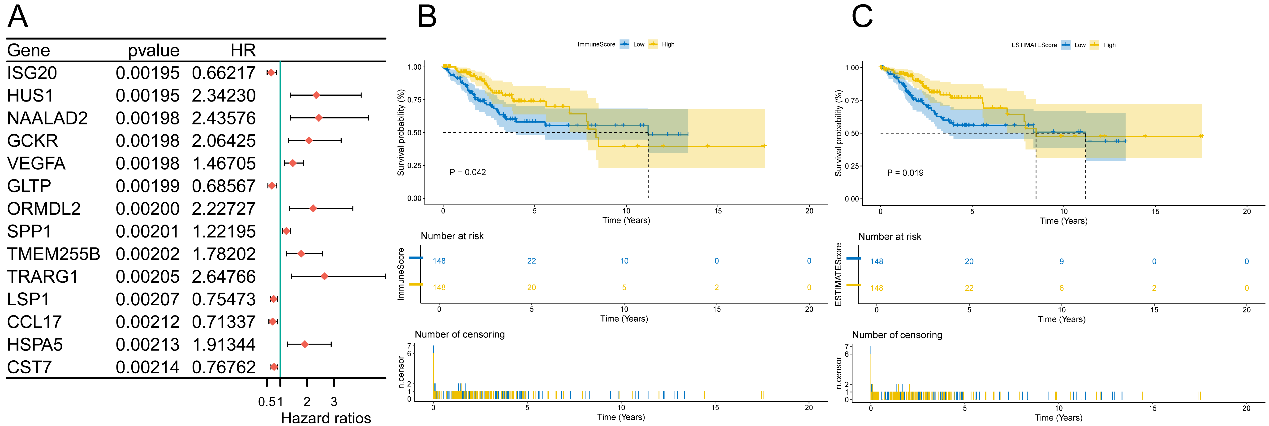


**Supplementary Figure 1.** SPP1 was a risk factor for cervical cancer. **A** The forest plot showed the risk scores of the top 14 genes related to prognosis in the TCGA_CESC dataset. **B, C** The survival analysis related to the ESTIMATE immune score suggested that SPP1 had the potential to become an independent prognostic biomarker.


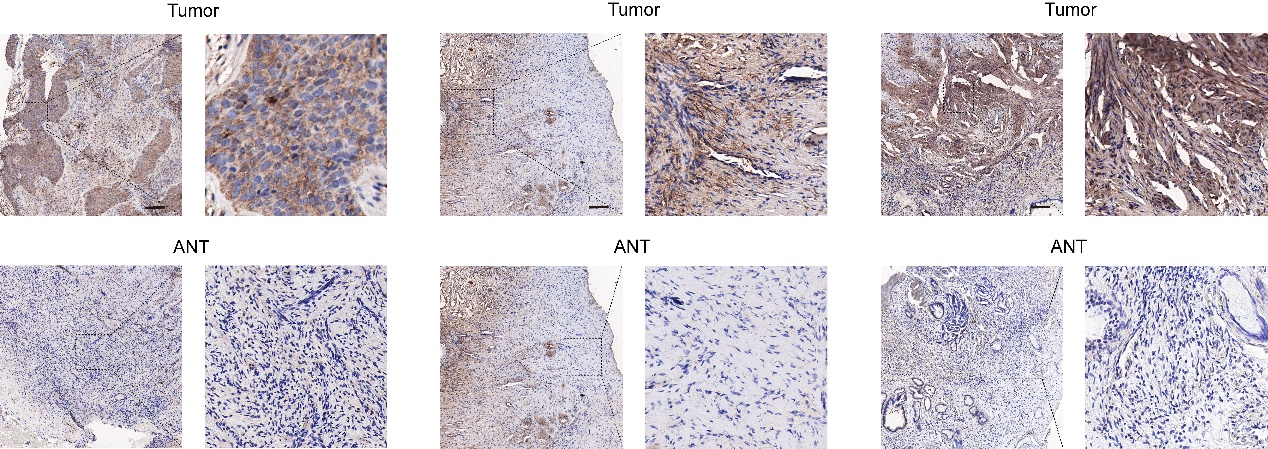


**Supplementary Figure 2.** IHC was used to detect the expression level of SPP1 protein in cervical cancer tissues (T) and adjacent normal tissues (ANT); scale bar = 100 μm.


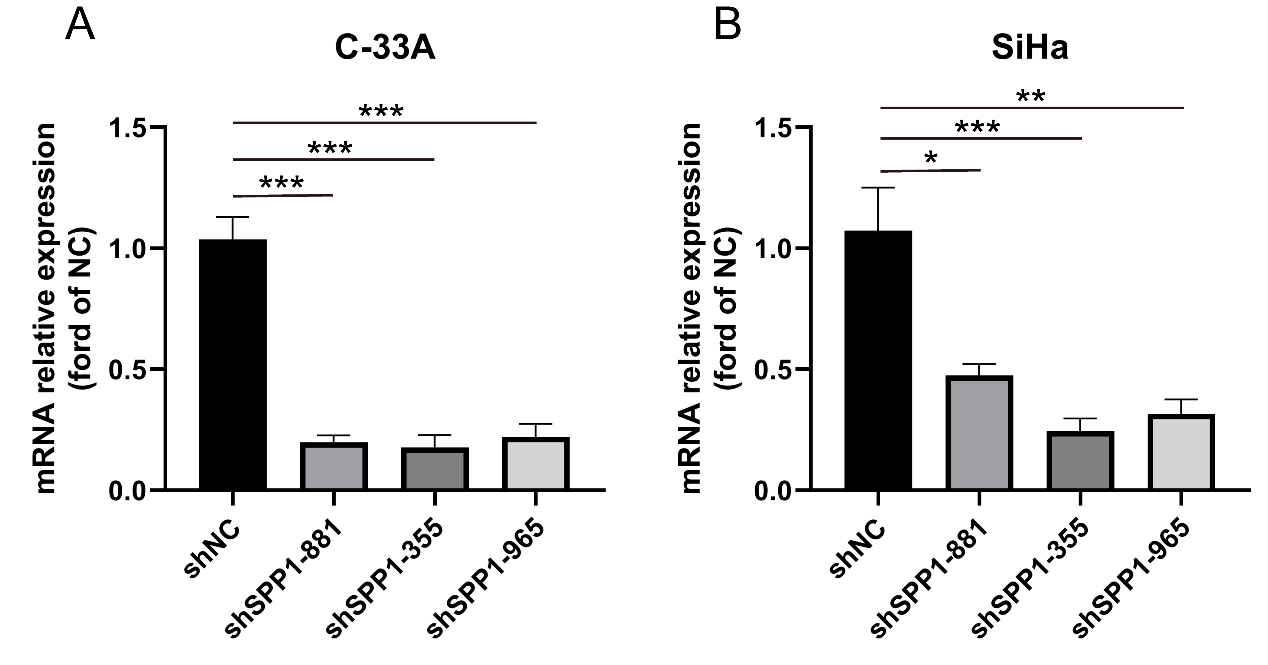


**Supplementary Figure 3.**Validations of SPP1 knockdown in C-33A (A) and SiHa (B) cells using RT-qPCR.


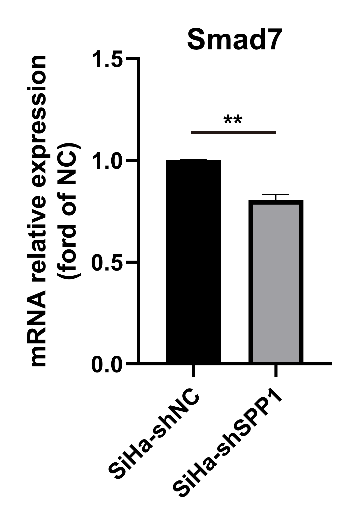


**Supplementary Figure 4.** The mRNA level of Smad7 was detected using RT-qPCR.


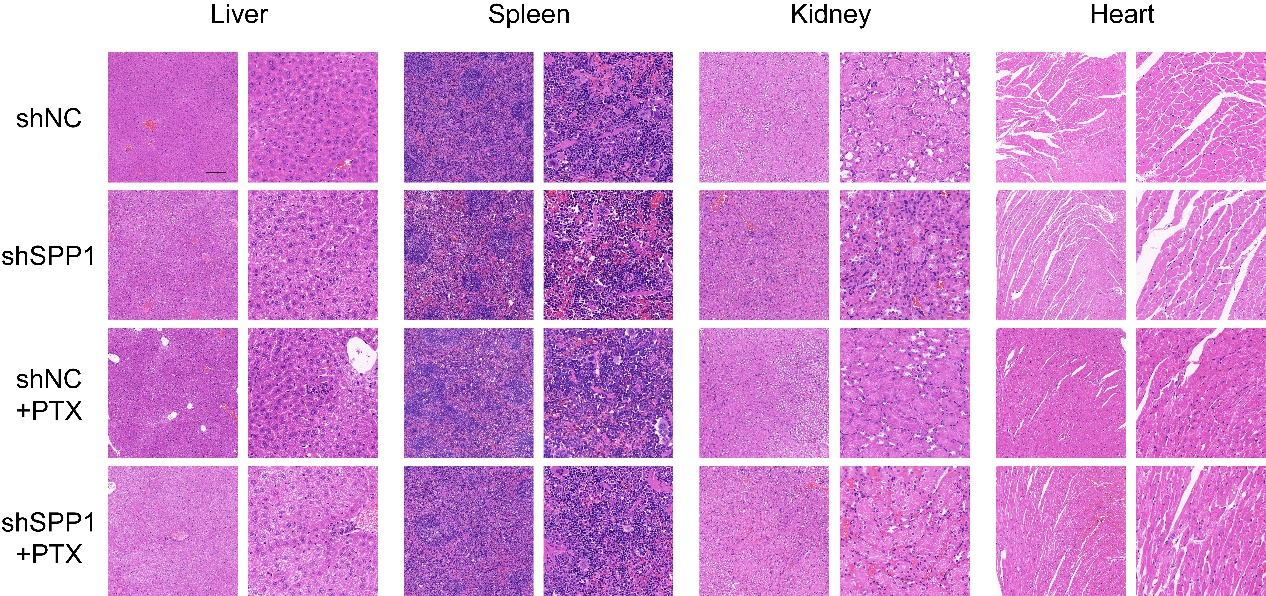


**Supplementary Figure 5.** The histopathological H&E staining results of representative samples of liver, spleen, kidney and heart of mice after treatment in each group; scale bar = 100 μm.

**Supplementary Table 1.** **Our cervical cancer cohorts.**

|  | **IHC score of SPP1** | | ***P* value** |
| --- | --- | --- | --- |
|  | **Low** | **High** |
| N | 10 | 45 |  |
| Age (years)  ＜60 | 3 (30.0%) | 36 (80.0%) | 0.375 |
| ≥60 | 7 (70.0%) | 9 (20.0%) |  |
| TBS (%) |  |  | 0.002 |
| LSIL | 7 (70.0%) | 1 (2.2%) |  |
| HSIL | 1 (10.0%) | 38 (82.2%) |  |
| Clinical stage (%) |  |  | 0.195 |
| Stage I | 0 (0.0%) | 2 (4.4%)  4 (8.9%) |  |
| Stage II | 0 (0.0%) |
| Histologic type (%) |  |  | 0.000 |
| Adenocarcinoma | 2 (20.0%) | 0 (0.0%) |  |
| Squamous cell carcinoma | 8 (80.0%) | 45 (100.0%) |  |

**Supplementary Table 2. List of antibodies.**

| **Antibodies** | **Company** | **Catalog No.** | **Dilution** |
| --- | --- | --- | --- |
| SPP1 | Proteintech | 22952-1-AP | WB: 1:2000  IHC: 1:500 |
| p-Smad2/3 | Cell Signaling Technology (CST) | 8828T | WB: 1:1000 |
| Total-Smad2/3 | CST | 3102S | WB: 1:1000 |
| TGF-β1 | HuaBio | HA721143 | WB: 1:2500 |
| p-AKT | CST | 4060P | WB: 1:2000 |
| Total-AKT | CST | 4691P | WB: 1:1000 |
| E-cadherin | CST | 3195P | WB: 1:1000 |
| N-cadherin | CST | 4061P | WB: 1:1000 |
| Snail | CST | 3879P | WB: 1:1000 |
| Vimentin | | CST | 5741P | WB: 1:1000 |
| GAPDH | | CST | 5174T | WB: 1:1000 |
| β-actin | absin | abs137975 | WB: 1:4000 |
